# Supplementary material for: Phenolic Profile and Antioxidant, Antibacterial, and Antiproliferative Activity of Juglans regia L. Male Flowers
Source: MDPI journal article supplement (doi:10.3390/molecules27092762), 2022-04-26
Supplement: s1 [file s1]

Supplementary material

# Phenolic profile and antioxidant, antibacterial, antiproliferative activity of *Juglans regia* L. male flowers

Natalia Żurek <sup>1</sup>, Agata Pawłowska <sup>1</sup>, Karolina Pycia <sup>1</sup>, Dorota Grabek-Lejko <sup>2</sup> and Ireneusz Kapusta <sup>1,\*</sup>

<sup>1</sup> Department Food Technology and Human Nutrition, Institute of Food Technology and Nutrition, University of Rzeszow, 4 Zelwerowicza St., 35-601 Rzeszow, Poland; nzurek@ur.edu.pl (N.Ż.); agpawlow-ska@ur.edu.pl (A.P.); kpycia@ur.edu.pl (K.P.); ikapusta@ur.edu.pl (I.K.)

<sup>2</sup> Department of Bioenergetics, Food Analysis and Microbiology, Institute of Food Technology and Nutrition, University of Rzeszow, 4 Zelwerowicza St., 35-601 Rzeszow, Poland; dgrabek@ur.edu.pl (D.G-L.)

\* Correspondence: ikapusta@ur.edu.pl; Tel.: +48-17-785-5238

## Content:

**Supplementary Figure S1:** Antioxidant activities of *J. regia* male flowers extracts (10-750 µg/ml).

**Supplementary Figure S2:** UPLC chromatogram of *J. regia* male flowers extracts and UV-Vis and MS spectra of identified compounds.

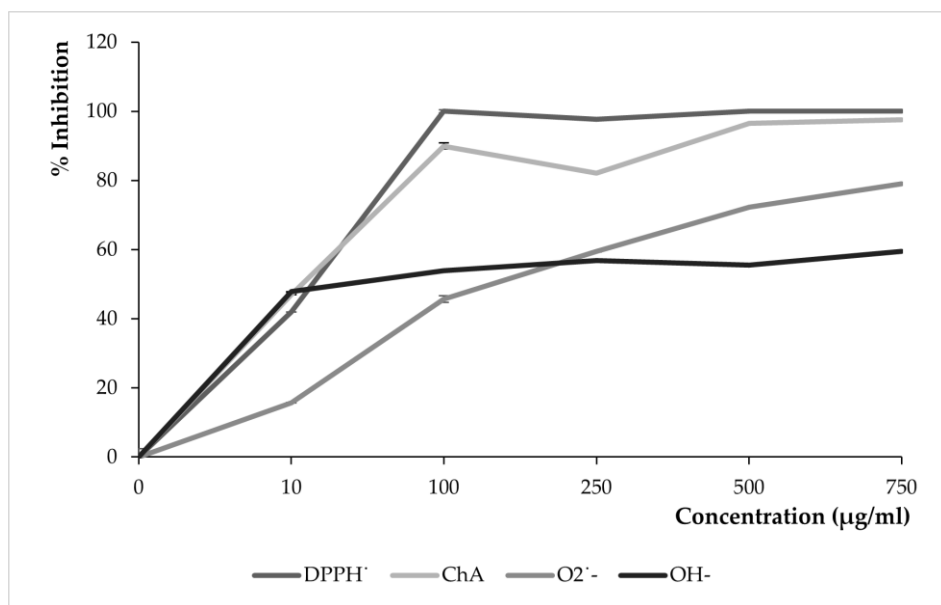

**Figure S1.** Antioxidant activities of *J. regia* male flowers extracts (10-750 µg/ml). Graphs represent mean values  $\pm$ SD from three independent experiments. Abbreviations: DPPH·, 2,2-diphenyl-1-picrylhydrazyl radical scavenging activity assay; ChA, chelating ability of ferrous ion; O<sub>2</sub><sup>·-</sup>, superoxide radical scavenging activity assay; OH·, hydroxyl radical scavenging activity assay; CUPRAC, copper ion reduction assay.

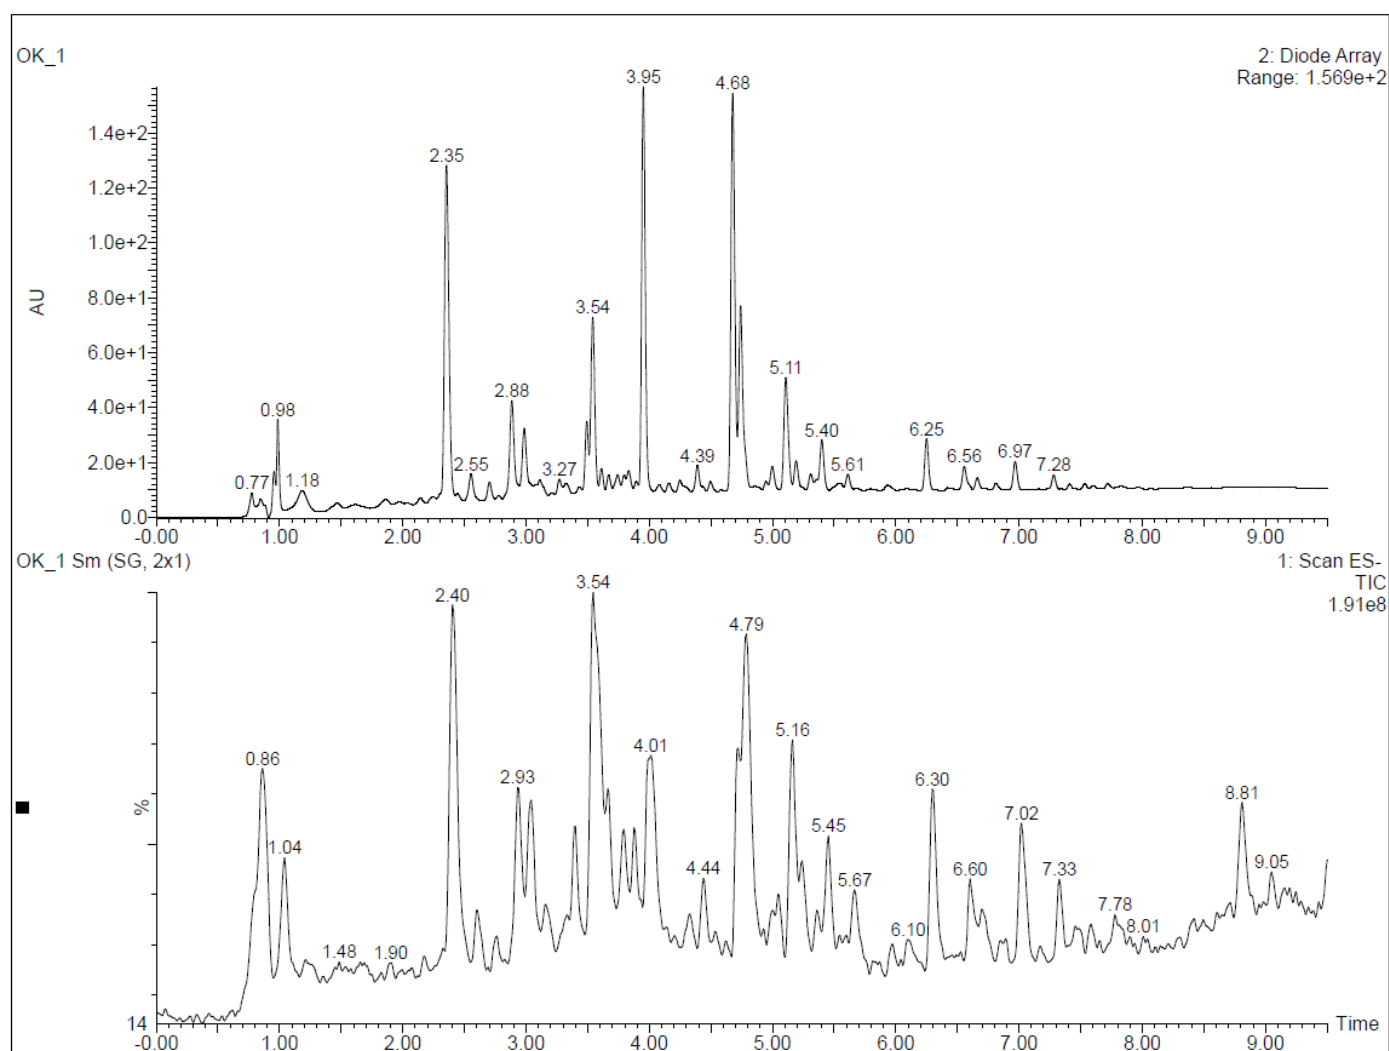

**Figure S2:** UPLC chromatogram of *J. regia* male flowers extracts and UV-Vis and MS spectra of identified compounds.
